# Supplementary material for: Impacts of Chronic Habitat Fragmentation on Genetic Diversity of Natural Populations of Prunus persica in China
Source: MDPI journal article supplement (doi:10.3390/plants11111458), 2022-05-30
Supplement: s1 [file s1]

**Table S1.** Characteristics of 23 nSSR loci surveyed across 16 natural populations of *P. persica*.

| Locus            | A   | $H_O$ | $H_S$ | $H_T$ |
|------------------|-----|-------|-------|-------|
| <i>BPPCT 006</i> | 6   | 0.804 | 0.528 | 0.579 |
| <i>BPPCT 007</i> | 5   | 0.014 | 0.338 | 0.584 |
| <i>BPPCT 008</i> | 9   | 0.144 | 0.568 | 0.798 |
| <i>BPPCT 015</i> | 8   | 0.082 | 0.387 | 0.638 |
| <i>BPPCT 017</i> | 6   | 0.215 | 0.465 | 0.709 |
| <i>BPPCT 020</i> | 9   | 0.625 | 0.477 | 0.590 |
| <i>BPPCT 025</i> | 6   | 0.087 | 0.418 | 0.572 |
| <i>BPPCT 028</i> | 6   | 0.035 | 0.405 | 0.637 |
| <i>CPPCT 002</i> | 4   | 0.766 | 0.552 | 0.654 |
| <i>CPPCT 006</i> | 4   | 0.035 | 0.447 | 0.683 |
| <i>CPPCT 016</i> | 3   | 0.038 | 0.150 | 0.260 |
| <i>CPPCT 017</i> | 5   | 0.155 | 0.522 | 0.680 |
| <i>CPPCT 022</i> | 5   | 0.090 | 0.499 | 0.724 |
| <i>CPPCT 033</i> | 4   | 0.000 | 0.353 | 0.511 |
| <i>UDP96-001</i> | 8   | 0.250 | 0.576 | 0.704 |
| <i>UDP96-003</i> | 10  | 0.245 | 0.629 | 0.814 |
| <i>UDP96-005</i> | 6   | 0.163 | 0.370 | 0.596 |
| <i>UDP96-013</i> | 6   | 0.114 | 0.363 | 0.695 |
| <i>UDP97-403</i> | 6   | 0.027 | 0.437 | 0.733 |
| <i>UDP98-024</i> | 9   | 0.160 | 0.461 | 0.622 |
| <i>UDP98-025</i> | 4   | 0.014 | 0.156 | 0.305 |
| <i>UDP98-409</i> | 12  | 0.122 | 0.613 | 0.864 |
| <i>UDP98-412</i> | 8   | 0.073 | 0.497 | 0.712 |
| Average          | 6.5 | 0.185 | 0.444 | 0.638 |

Note: A, number of alleles per locus;  $H_O$ , observed heterozygosity within populations;  $H_S$ , expected heterozygosity within populations;  $H_T$ , total genetic diversity over all populations.

**Table S2.** Matrix of pairwise comparisons of genetic differentiation ( $F_{ST}$ ) for natural population of *P. persica*.

|    | MA           | MB    | MC    | MD    | ME    | MF    | MG           | MH    | MJ    | MK    | ML    | MM    | MN    | MO    | MP    | MQ |
|----|--------------|-------|-------|-------|-------|-------|--------------|-------|-------|-------|-------|-------|-------|-------|-------|----|
| MA | -            | **    | **    | **    | **    | **    | **           | **    | **    | **    | **    | **    | **    | **    | **    | ** |
| MB | 0.143        | -     | **    | **    | **    | **    | **           | **    | **    | **    | **    | **    | **    | **    | **    | ** |
| MC | 0.226        | 0.288 | -     | **    | **    | **    | **           | **    | **    | **    | **    | **    | **    | **    | **    | ** |
| MD | 0.368        | 0.359 | 0.457 | -     | **    | **    | **           | **    | **    | **    | **    | **    | **    | **    | **    | ** |
| ME | 0.239        | 0.260 | 0.381 | 0.528 | -     | **    | **           | **    | **    | **    | **    | **    | **    | **    | **    | ** |
| MF | 0.167        | 0.163 | 0.325 | 0.415 | 0.196 | -     | **           | **    | **    | **    | **    | **    | **    | **    | **    | ** |
| MG | 0.434        | 0.447 | 0.551 | 0.542 | 0.560 | 0.525 | -            | **    | **    | **    | **    | **    | **    | **    | **    | ** |
| MH | 0.289        | 0.251 | 0.417 | 0.322 | 0.422 | 0.357 | 0.311        | -     | **    | **    | **    | **    | **    | **    | **    | ** |
| MJ | <b>0.123</b> | 0.151 | 0.296 | 0.308 | 0.285 | 0.198 | 0.399        | 0.256 | -     | **    | *     | **    | **    | **    | **    | ** |
| MK | 0.157        | 0.224 | 0.362 | 0.352 | 0.327 | 0.231 | 0.470        | 0.261 | 0.142 | -     | **    | **    | **    | **    | **    | ** |
| ML | 0.174        | 0.162 | 0.324 | 0.280 | 0.310 | 0.236 | 0.407        | 0.213 | 0.091 | 0.192 | -     | **    | **    | **    | **    | ** |
| MM | 0.180        | 0.144 | 0.344 | 0.305 | 0.298 | 0.227 | 0.429        | 0.220 | 0.147 | 0.232 | 0.138 | -     | **    | **    | **    | ** |
| MN | 0.226        | 0.259 | 0.390 | 0.486 | 0.307 | 0.287 | 0.577        | 0.401 | 0.235 | 0.292 | 0.235 | 0.243 | -     | **    | **    | ** |
| MO | 0.203        | 0.316 | 0.420 | 0.493 | 0.323 | 0.279 | <b>0.601</b> | 0.434 | 0.307 | 0.335 | 0.316 | 0.281 | 0.214 | -     | **    | ** |
| MP | 0.247        | 0.319 | 0.466 | 0.370 | 0.446 | 0.381 | 0.560        | 0.352 | 0.273 | 0.339 | 0.304 | 0.270 | 0.374 | 0.323 | -     | ** |
| MQ | 0.287        | 0.307 | 0.453 | 0.433 | 0.429 | 0.351 | 0.540        | 0.345 | 0.271 | 0.351 | 0.290 | 0.220 | 0.379 | 0.361 | 0.340 | -  |

\*\*,  $P < 0.01$ , \*,  $P < 0.05$ .

**Table S3.** Migration rates (m) across the 16 natural populations of *P. persica*.

|                                 | MA     | MB     | MC     | MD     | ME     | MF     | MG     | MH     | MJ     | MK     | ML     | MM     | MN     | MO     | MP     | MQ     |
|---------------------------------|--------|--------|--------|--------|--------|--------|--------|--------|--------|--------|--------|--------|--------|--------|--------|--------|
| Mean historical migration rates |        |        |        |        |        |        |        |        |        |        |        |        |        |        |        |        |
| MA                              |        | 0.0915 | 0.1111 | 0.0543 | 0.0775 | 0.1311 | 0.0051 | 0.0177 | 0.0409 | 0.0655 | 0.0899 | 0.1825 | 0.0765 | 0.2089 | 0.0719 | 0.0787 |
| MB                              | 0.0735 |        | 0.0213 | 0.1475 | 0.0479 | 0.0467 | 0.0387 | 0.1435 | 0.1001 | 0.0861 | 0.2171 | 0.1271 | 0.0931 | 0.1629 | 0.0193 | 0.0159 |
| MC                              | 0.1527 | 0.0903 |        | 0.0703 | 0.1631 | 0.1143 | 0.0717 | 0.0409 | 0.1643 | 0.0875 | 0.0603 | 0.1491 | 0.0473 | 0.0455 | 0.0497 | 0.0047 |
| MD                              | 0.0719 | 0.0907 | 0.1059 | 0.0000 | 0.1411 | 0.0803 | 0.0879 | 0.0635 | 0.1267 | 0.0261 | 0.1049 | 0.0817 | 0.1221 | 0.1887 | 0.1455 | 0.1797 |
| ME                              | 0.0123 | 0.0121 | 0.0291 | 0.0327 | 0.0000 | 0.1483 | 0.0129 | 0.1431 | 0.0765 | 0.1541 | 0.1045 | 0.1291 | 0.1261 | 0.1531 | 0.0693 | 0.0409 |
| MF                              | 0.0161 | 0.0089 | 0.0317 | 0.1397 | 0.0613 |        | 0.1181 | 0.0601 | 0.1887 | 0.0053 | 0.1101 | 0.1197 | 0.0415 | 0.1103 | 0.0659 | 0.0141 |
| MG                              | 0.1467 | 0.0695 | 0.0459 | 0.1160 | 0.0581 | 0.0133 |        | 0.0415 | 0.1175 | 0.1217 | 0.2229 | 0.0777 | 0.1049 | 0.0593 | 0.0681 | 0.1137 |
| MH                              | 0.0105 | 0.0665 | 0.0231 | 0.1325 | 0.0719 | 0.1007 | 0.1585 |        | 0.1503 | 0.1473 | 0.0119 | 0.1153 | 0.0457 | 0.1121 | 0.0789 | 0.2911 |
| MJ                              | 0.0915 | 0.1049 | 0.0169 | 0.0291 | 0.1415 | 0.1779 | 0.2493 | 0.1041 |        | 0.1759 | 0.1021 | 0.0545 | 0.0919 | 0.0881 | 0.0105 | 0.0063 |
| MK                              | 0.0855 | 0.1417 | 0.0469 | 0.0467 | 0.0685 | 0.0815 | 0.0519 | 0.0363 | 0.0679 |        | 0.1519 | 0.0443 | 0.1543 | 0.1129 | 0.0793 | 0.0269 |
| ML                              | 0.0085 | 0.0703 | 0.0369 | 0.1461 | 0.0075 | 0.0617 | 0.0755 | 0.1913 | 0.2443 | 0.0079 |        | 0.1817 | 0.0677 | 0.0839 | 0.1635 | 0.0065 |
| MM                              | 0.0443 | 0.1257 | 0.1059 | 0.0555 | 0.1635 | 0.1069 | 0.0645 | 0.0633 | 0.2165 | 0.0827 | 0.1839 |        | 0.0963 | 0.0583 | 0.0581 | 0.1723 |
| MN                              | 0.0885 | 0.0601 | 0.0751 | 0.0767 | 0.0733 | 0.2327 | 0.0641 | 0.1265 | 0.0633 | 0.1373 | 0.1707 | 0.0729 |        | 0.1401 | 0.0299 | 0.0915 |
| MO                              | 0.0575 | 0.0267 | 0.1273 | 0.0055 | 0.0597 | 0.0355 | 0.1053 | 0.0695 | 0.0727 | 0.2197 | 0.0659 | 0.1427 | 0.0697 |        | 0.1205 | 0.0157 |
| MP                              | 0.1541 | 0.2543 | 0.0869 | 0.1365 | 0.0733 | 0.0777 | 0.1021 | 0.1937 | 0.0789 | 0.1231 | 0.0697 | 0.1187 | 0.1075 | 0.0931 |        | 0.1151 |
| MQ                              | 0.0967 | 0.1797 | 0.0357 | 0.0891 | 0.0543 | 0.0103 | 0.0387 | 0.1217 | 0.0073 | 0.2169 | 0.2301 | 0.1829 | 0.0915 | 0.0659 | 0.0371 |        |
| Mean recent migration rate      |        |        |        |        |        |        |        |        |        |        |        |        |        |        |        |        |
| MA                              |        | 0.0098 | 0.0115 | 0.0087 | 0.0090 | 0.0089 | 0.0087 | 0.0086 | 0.0094 | 0.0168 | 0.0089 | 0.0422 | 0.0088 | 0.0177 | 0.0086 | 0.0088 |
| MB                              | 0.0210 |        | 0.0093 | 0.0085 | 0.0098 | 0.0100 | 0.0086 | 0.0086 | 0.0174 | 0.0122 | 0.0128 | 0.0090 | 0.0096 | 0.0087 | 0.0085 | 0.0087 |
| MC                              | 0.0095 | 0.0107 |        | 0.0126 | 0.0087 | 0.0098 | 0.0085 | 0.0086 | 0.0095 | 0.0116 | 0.0105 | 0.0096 | 0.0092 | 0.0091 | 0.0085 | 0.0086 |
| MD                              | 0.0086 | 0.0085 | 0.0096 |        | 0.0086 | 0.0111 | 0.0085 | 0.0086 | 0.0102 | 0.0138 | 0.0085 | 0.0135 | 0.0086 | 0.0086 | 0.0087 | 0.0085 |
| ME                              | 0.0110 | 0.0093 | 0.0086 | 0.0085 |        | 0.0087 | 0.0086 | 0.0086 | 0.0087 | 0.0086 | 0.0086 | 0.0089 | 0.0085 | 0.0089 | 0.0086 | 0.0086 |
| MF                              | 0.0147 | 0.0131 | 0.0100 | 0.0086 | 0.0168 |        | 0.0086 | 0.0087 | 0.0088 | 0.0099 | 0.0090 | 0.0086 | 0.0087 | 0.0087 | 0.0086 | 0.0086 |
| MG                              | 0.0093 | 0.0085 | 0.0086 | 0.0085 | 0.0088 | 0.0086 |        | 0.0106 | 0.0088 | 0.0086 | 0.0120 | 0.0085 | 0.0085 | 0.0086 | 0.0097 | 0.0086 |
| MH                              | 0.0092 | 0.0085 | 0.0086 | 0.0086 | 0.0086 | 0.0085 | 0.0157 |        | 0.0096 | 0.0085 | 0.0088 | 0.0086 | 0.0085 | 0.0086 | 0.0115 | 0.0085 |
| MJ                              | 0.0098 | 0.0106 | 0.0086 | 0.0089 | 0.0088 | 0.0087 | 0.0088 | 0.0085 |        | 0.0128 | 0.0405 | 0.0118 | 0.0088 | 0.0109 | 0.0086 | 0.0089 |
| MK                              | 0.0104 | 0.0105 | 0.0090 | 0.0094 | 0.0085 | 0.0125 | 0.0085 | 0.0086 | 0.0115 |        | 0.0165 | 0.0139 | 0.0088 | 0.0123 | 0.0092 | 0.0087 |
| ML                              | 0.0100 | 0.0154 | 0.0104 | 0.0086 | 0.0101 | 0.0094 | 0.0111 | 0.0085 | 0.0099 | 0.0089 |        | 0.0458 | 0.0087 | 0.0093 | 0.0088 | 0.0088 |
| MM                              | 0.0144 | 0.0090 | 0.0098 | 0.0087 | 0.0088 | 0.0094 | 0.0086 | 0.0092 | 0.0092 | 0.0089 | 0.0099 |        | 0.0087 | 0.0092 | 0.0089 | 0.0088 |
| MN                              | 0.0166 | 0.0225 | 0.0162 | 0.0088 | 0.0086 | 0.0099 | 0.0085 | 0.0086 | 0.0107 | 0.0125 | 0.0130 | 0.0103 |        | 0.0108 | 0.0086 | 0.0086 |

|    |        |        |        |        |        |        |        |        |        |        |        |        |        |        |        |        |
|----|--------|--------|--------|--------|--------|--------|--------|--------|--------|--------|--------|--------|--------|--------|--------|--------|
| MO | 0.0258 | 0.0090 | 0.0108 | 0.0087 | 0.0096 | 0.0087 | 0.0086 | 0.0085 | 0.0148 | 0.0128 | 0.0087 | 0.0096 | 0.0092 |        | 0.0086 | 0.0087 |
| MP | 0.0089 | 0.0086 | 0.0086 | 0.0086 | 0.0085 | 0.0085 | 0.0088 | 0.0134 | 0.0147 | 0.0091 | 0.0096 | 0.0176 | 0.0085 | 0.0092 |        | 0.0087 |
| MQ | 0.0092 | 0.0089 | 0.0089 | 0.0087 | 0.0085 | 0.0086 | 0.0087 | 0.0085 | 0.0119 | 0.0089 | 0.0139 | 0.0093 | 0.0086 | 0.0087 | 0.0084 |        |

---

The source populations for migration are given in rows and populations receiving migrants are in columns.  $m = M\mu$  ( $M$  is the mutation-scaled effective immigration rate,  $\mu$  is the mutation rate per site:  $3 \times 10^{-4}$ ).

**Table S4.** Twenty-three SSR markers used for amplification of 16 populations of wild *P. persica*.

| Marker    | Linkage group | Forward sequence        | Reverse sequence         | Reference                                    |
|-----------|---------------|-------------------------|--------------------------|----------------------------------------------|
| BPPCT 006 | G8            | GCTTGTGGCATGGAAGC       | CCCTGTTTCTCATAGAACTCACAT | Dirlewanger et al. 2002                      |
| BPPCT 007 | G3            | TCATTGCTCGTCATCAGC      | CAGATTTCTGAAGTTAGCGGTA   |                                              |
| BPPCT 008 | G6            | ATGGTGTGTATGGACATGATGA  | CCTCAACCTAAGACACCTTCACT  |                                              |
| BPPCT 015 | G4            | ATGGAAGGGAAGAGAAATCG    | GTCATCTCAGTCAACTTTTCCG   |                                              |
| BPPCT 017 | G5            | TTAAGAGTTTGTGATGGGAACC  | AAGCATAATTTAGCATAACCAAGC |                                              |
| BPPCT 020 | G1            | CGTGGATGGTCAAGATGC      | ATTGACGTGGACTTACAGGTG    |                                              |
| BPPCT 025 | G6            | TCCTGCGTAGAAGAAGGTAGC   | CGACATAAAGTCCAAATGGC     |                                              |
| BPPCT 028 | G1            | TCAAGTTAGCTGAGGATCGC    | GAGCTTGCCTATGAGAAGACC    |                                              |
| CPPCT 002 | G3            | GGAGCTGCAATATTGCTG      | GTTAGGGAAGCATCTCAC       | Aranzana et al. 2003                         |
| CPPCT 006 | G8            | AATTAActCCAACAGCTCCA    | ATGGTTGCTTAATTCAATGG     |                                              |
| CPPCT 016 | G1            | AATTCCCTATGGAAATTAGA    | CGCATATTATAGGTAGGAAA     |                                              |
| CPPCT 017 | G7            | TGACATGCATGCACTAAACAA   | TGCAAATGCAATTTTCATAAAGG  |                                              |
| CPPCT 022 | G7            | CAATTAGCTAGAGAGAATTATTG | GACAAGAAGCAAGTAGTTTG     |                                              |
| CPPCT 033 | G7            | TCAGCAAActAGAAACAAACC   | TTGCAATCTGGTTGATGTT      |                                              |
| UDP96-001 | G6            | AGTTTGATTTTCTGATGCATCC  | TGCCATAAGGACCGGTATGT     | Cipriani et al. 1999<br>Testolin et al. 2000 |
| UDP96-003 | G4            | TTGCTCAAAAGTGTCTGTTGC   | ACACGTAGTGCAACACTGGC     |                                              |
| UDP96-005 | G1            | GTAACGCTCGCTACCACAAA    | CCTGCATATCACCACCCAG      |                                              |
| UDP96-013 | G2            | ATTCTTCACTACACGTGCACG   | CCCCAGACATACTGTGGCTT     |                                              |
| UDP97-403 | G3            | CTGGCTTACAACTCGCAAGC    | CGTCGACCAACTGAGACTCA     |                                              |
| UDP98-024 | G4            | CCTTGATGCATAATCAAACAGC  | GGACACACTGGCATGTGAAG     |                                              |
| UDP98-025 | G2            | GGGAGGTTACTATGCCATGAAG  | CGCAGACATGTAGTAGGACCTC   |                                              |
| UDP98-409 | G8            | GCTGATGGGTTTTATGGTTTTTC | CGGACTCTTATCCTCTATCAACA  |                                              |
| UDP98-412 | G6            | AGGGAAAGTTTCTGCTGCAC    | GCTGAAGACGACGATGATGA     |                                              |
